# Supplementary material for: Fucoidan-coated core–shell magnetic mesoporous silica nanoparticles for chemotherapy and magnetic hyperthermia-based thermal therapy applications
Source: Royal Society of Chemistry journal article supplement (doi:10.1039/c7nj03211k), 2017-01-01
Supplement: c7nj03211k1.pdf [file c7nj03211k1.pdf]

## Electronic Supporting Information

### **Fucoidan coated core-shell magnetic mesoporous silica nanoparticles for chemotherapy and magnetic hyperthermia-based thermal therapy applications**

Madhappan Santha Moorthy,<sup>a</sup> Subramanian Bharathiraja,<sup>a</sup> Panchanathan Manivasagan,<sup>a</sup>

Sudip Mondal,<sup>a</sup> Hyehyun Kim,<sup>b</sup> Kang Dae Lee,<sup>c</sup> and Junghwan Oh,<sup>a,b\*</sup>

<sup>a</sup> *Department of Biomedical Engineering and Center for Marine-Integrated Biotechnology  
(BK21 Plus), Pukyong National University, Busan-48513, Republic of Korea*

<sup>b</sup> *Marine-Integrated Bionics Research Center, Pukyong National University,  
Busan-48513, Republic of Korea*

<sup>c</sup> *Department of Otolaryngology-Head and Neck Surgery, Kosin University College of Medicine,  
Busan-48513, Republic of Korea*

\*Email: [jungoh@pknu.ac.kr](mailto:jungoh@pknu.ac.kr)

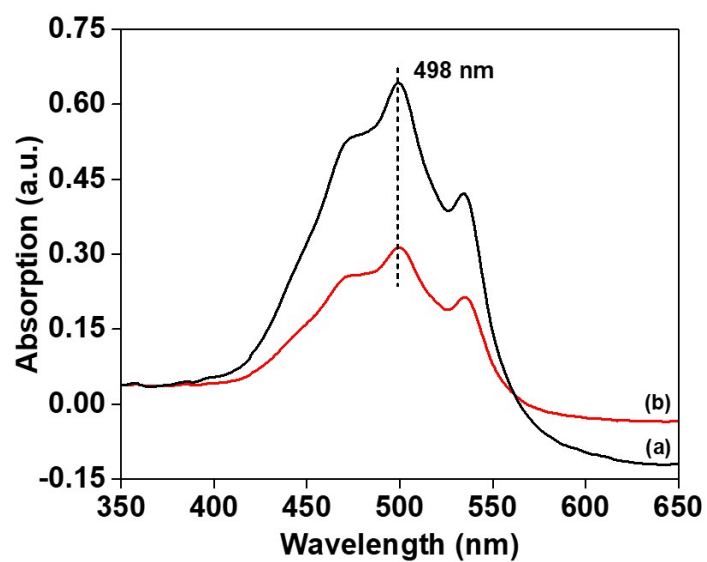

**Figure S1** UV-vis spectra of (a) initial concentration of Dox solution; and (b) final concentration of Dox solution after absorption by FeNP@SiOH@Fuc NPs.

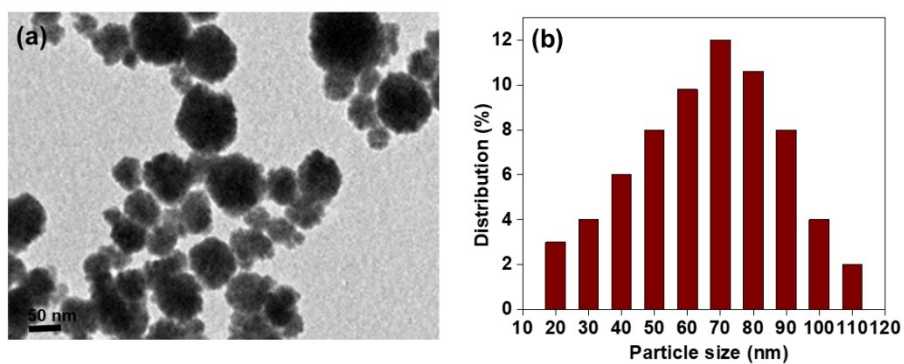

**Figure S2** (a) FETEM and (b) the corresponding particle size distribution of the pristine  $\text{Fe}_3\text{O}_4$  nanoparticles.

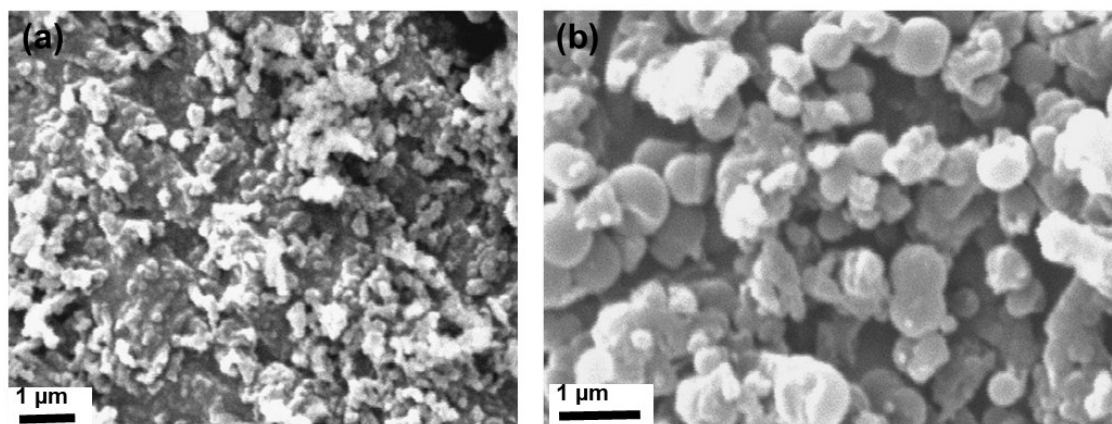

**Figure S3** FESEM images of the (a) pristine  $\text{Fe}_3\text{O}_4$  nanoparticles and the (b)  $\text{FeNP@SiOH@Fuc}$  NPs, respectively.

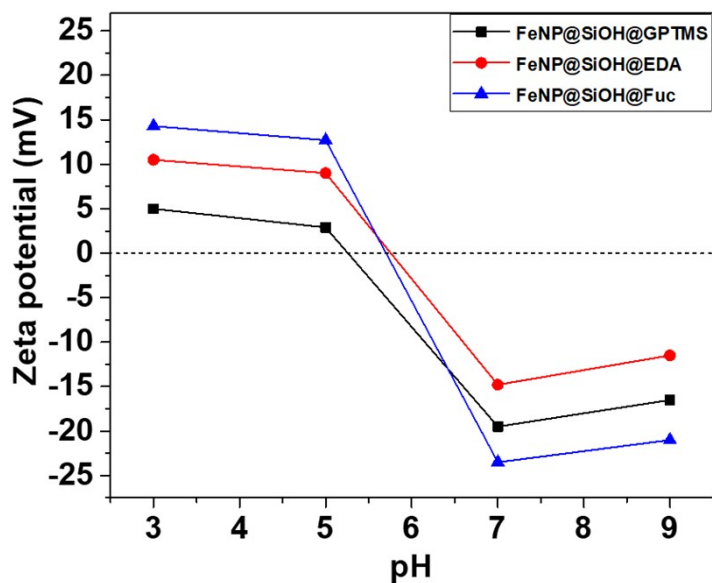

**Figure S4** Zeta potentials of  $\text{FeNP@SiOH@GPTMS}$ ;  $\text{FeNP@SiOH@EDA}$  and  $\text{FeNP@SiOH@Fuc}$  nanoparticles as a function of different pH (pH 3, 5, 7 and 9) conditions.

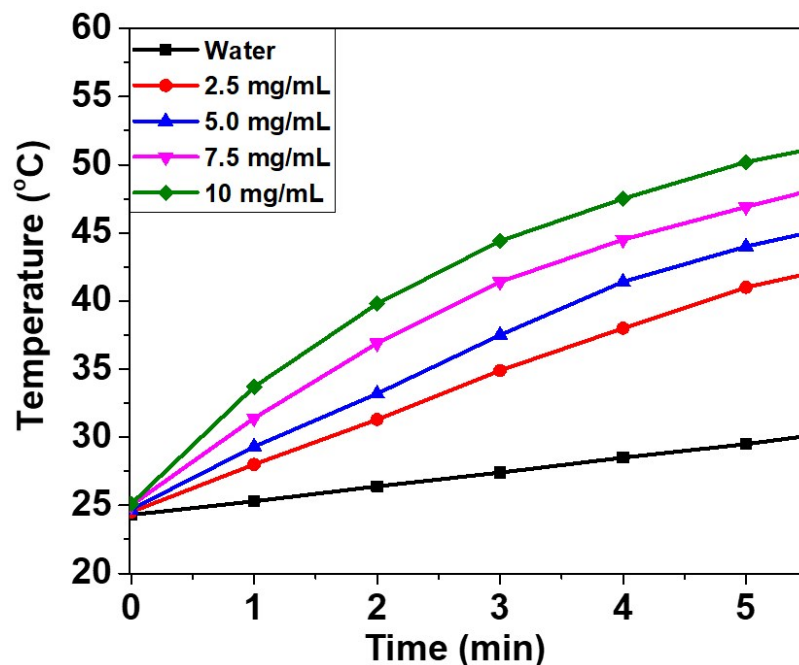

**Figure S5** Thermal response curves of FeNP@SiOH@Fuc NPs dispersed in water with the different concentrations and subjected to an AMF ( $f = 409$  kHz and  $H = 180$  Gauss).

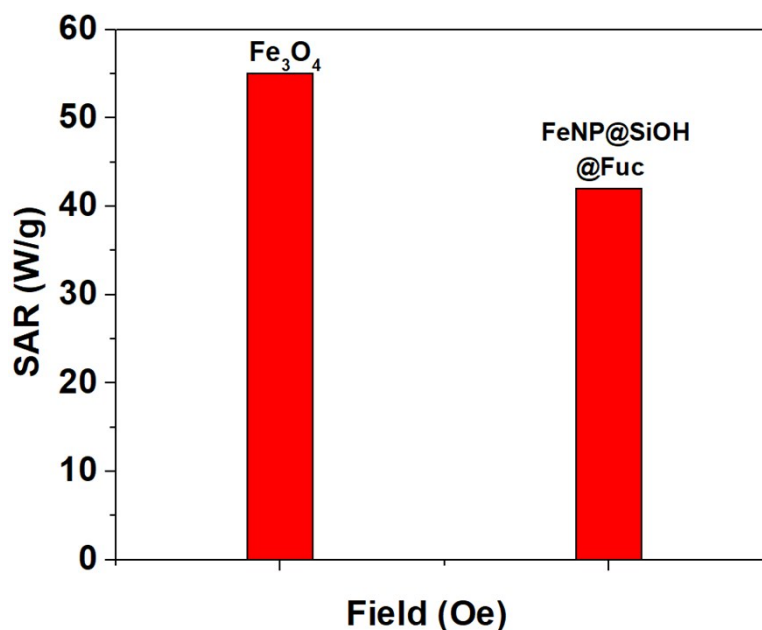

**Figure S6** The SAR values of pristine  $\text{Fe}_3\text{O}_4$  nanoparticles and FeNP@SiOH@Fuc NPs under magnetic field frequency  $f = 409$  kHz and applied magnetic field  $H = 180$  Gauss.

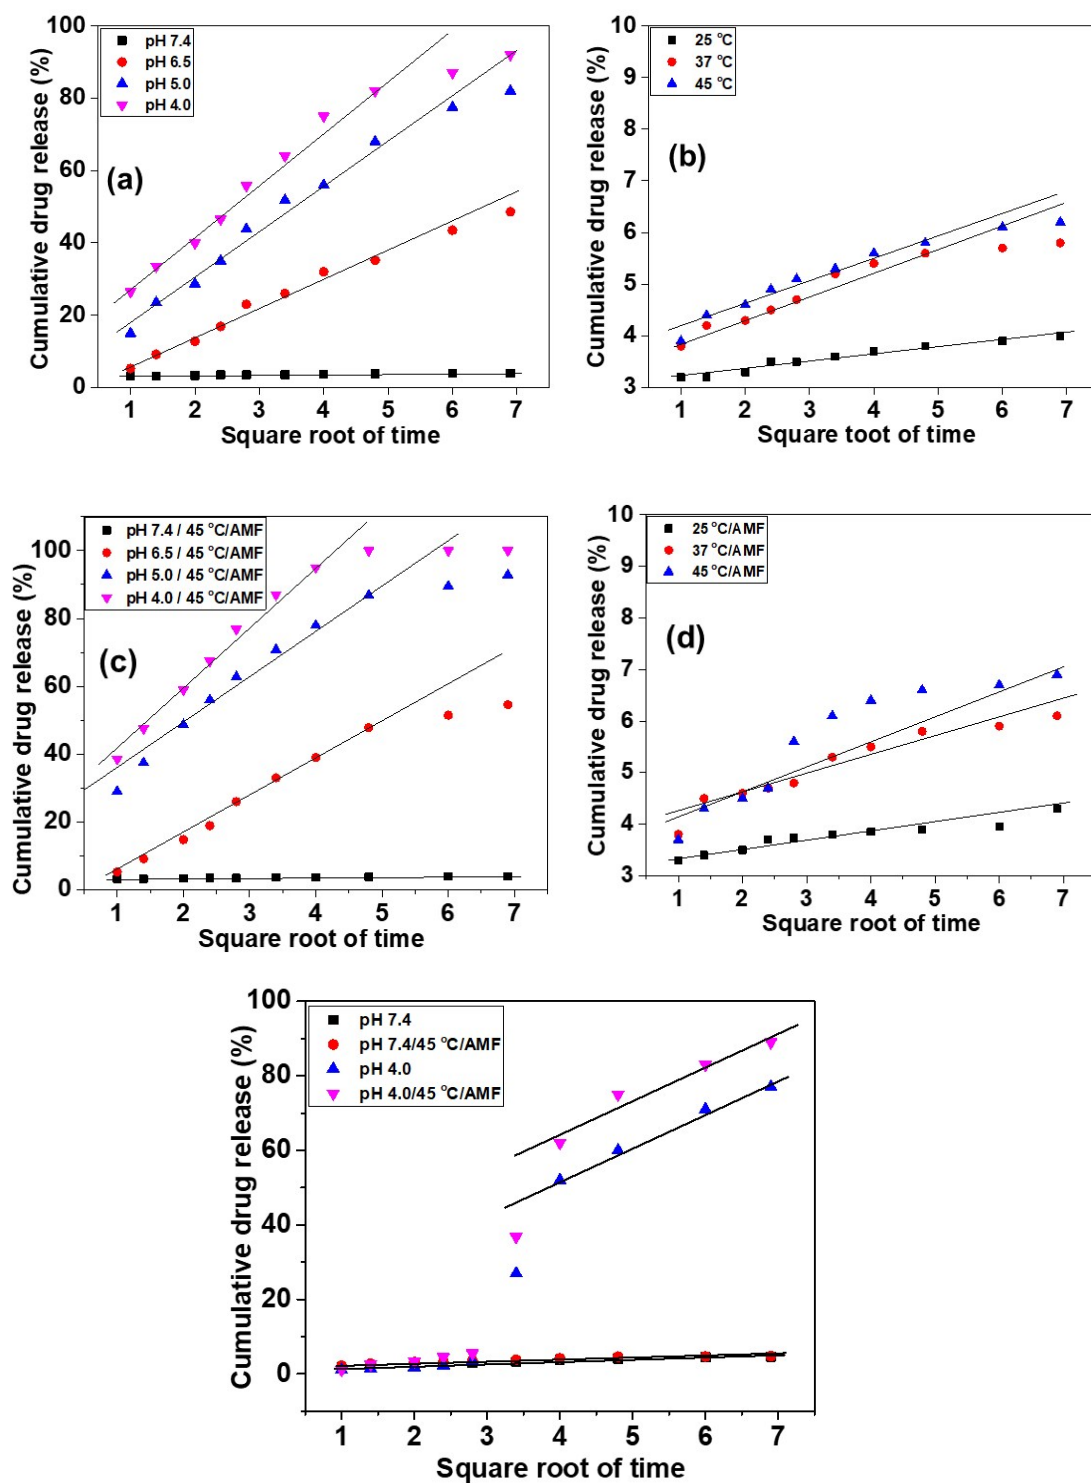

**Figure S7** Higuchi release profile of Dox from the FeNP@SiOH@Fuc NPs system.
